# Supplementary material for: Functional drug screening of tumor organoids on an Active-Matrix Digital Microfluidic Chip for cancer precision medicine
Source: Research Square preprint supplement (doi:10.21203/rs.3.rs-7772352/v1), 2025-10-20
Supplement: Supplementary file 1 [file 776ad72a37697d68a13f00d9.docx]

|  | **Patient 3** | **Patient 4** | **Patient 7** |
| --- | --- | --- | --- |
| **Macroscopic findings** | Lung segment tissue, size 16×10×3 cm, clinically opened, a nodule is seen at the suture mark, size 2.1×1.6×1.5 cm, cut surface gray-white, moderate consistency, well-defined borders, in close contact with the pleura. | Left lower lung, lung lobe tissue, size 16×8×2 cm, 2.5 cm from bronchial resection margin, a nodule is seen at the suture mark, size 2.2×1.5×0.8 cm, cut surface gray-brown, moderate consistency, poorly defined borders, closely adjacent to the pleura, pleural indentation. | Right upper lung: wedge-shaped lung tissue, size 12.5×3.5×2.5 cm, clinically opened, a mass is found at the suture mark, size 2.8×2.5×2 cm, cut surface gray-white, firm consistency, poorly defined borders, closely adjacent to the pleura, parietal pleura nodule: gray-red tissue, 0.2 cm in diameter. Visceral pleura: wedge-shaped lung tissue, size 5×2×0.4 cm, a nodule is seen at the suture mark, 0.3 cm in diameter, cut surface gray-white, firm, well-defined borders, in close contact with the pleura. |
| **Pathological diagnosis** | (Left upper lung) Invasive adenocarcinoma, non-mucinous, predominantly acinar subtype; histologic grade: moderately differentiated; IASLC grade: Grade 2; no evidence of alveolar spread; no definite nerve or vascular invasion; pleura not involved; bronchial margin free of cancer involvement, no cancer in the peribronchial lymph nodes; pTNM stage: pT1N0Mx. | (Left upper lung) Invasive adenocarcinoma, non-mucinous, predominantly acinar subtype; histologic grade: moderately differentiated; IASLC grade: Grade 2; no definite nerve or vascular invasion; alveolar spread seen (STAS(+)); no cancer in the peribronchial lymph nodes (0/2); bronchial margin free of cancer, further special staining required for pleura status and pTNM staging. | (Right upper lung mass) Tumor cells show a nodular pattern, solid growth, abundant cytoplasm, distinct nucleolus, scattered necrosis with acute and chronic inflammatory cell infiltration within the tumor focus. Immunohistochemistry results support non-small cell lung cancer with SMARCA4 loss, with a small amount (approximately 1%) of classic adenocarcinoma components in the tumor focus, presence of cancer emboli in the vessels, no definite nerve invasion, alveolar spread (STAS(+)); visceral pleura free of cancer involvement. |

**Table 3 Patient Clinical Information Form**
